# Supplementary material
Source: publisher site journal article supplement (https://www.dovepress.com/get_supplementary_file.php?f=260766.xlsx)
Supplement: Supplementary file 1 [file get_supplementary_file.php]

## Sheet: Dataset-1
Dataset 1: Non-synonymous mutations observed in ColR APEC isolates.
Product (CP004009 (CDS))	CP004009 (CDS)	Region	Type	Reference	Allele	Protein id	Amino acid change	Isolates having mutation	Isolates with no-mutation
sensor protein BasS/PmrB	APECO78_01485	322995	SNV	A	T	AGC85036.1	Leu14Gln	Col-SM3-5/Col-SM2-2/Col-6/Col-5	DMSO-1/DMSO-3/Col-SM3-2/Col-SM3-6/Col-SM2-6/Col-SM2-4
sensor protein BasS/PmrB	APECO78_01485	322762	SNV	T	G	AGC85036.1	Thr92Pro	Col-3	DMSO-1/DMSO-3/Col-SM3-2/Col-SM3-6/Col-SM2-6/Col-SM2-4
two-component response regulator (BasR)	APECO78_01490	323475	SNV	G	A	AGC85037.1	Ala80Val	Col-1	DMSO-1/Col-SM3-2/Col-SM2-4/DMSO-3/Col-SM3-6
hypothetical protein	APECO78_06195	1271735	SNV	C	T	AGC85972.1	Arg15Lys	Col-SM3-5/Col-6	DMSO-1/DMSO-3/Col-SM3-2/Col-SM2-4/Col-SM3-6/Col-SM2-6
hypothetical protein	APECO78_06200	1272030..1272031	MNV	TT	CC	AGC85973.1	Gln92Arg	Col-SM3-5/Col-SM2-2/Col-6/Col-5/Col-3/Col-1	DMSO-1
hypothetical protein	APECO78_04025	831259..831354	Deletion	CCTGGCGCTGCTCAGGCGAGGCTGACTGAATACGCTCACGCGCTGCGTCTCTTCGCTGCTGGATCTGTGGGTTAGTCTGCATTTTCTCGCGGACTG		AGC85542.1	Ala496_Gln527del	Col-SM3-5/Col-5/Col-3/Col-1	Col-SM2-4
hypothetical protein	APECO78_04025	831377..831472	Deletion	GGACTGAATACGCTCACGCGCTGCGTCTCTTCGCTGCTGGATCTGTGGGTTAGTCTGCATTTTCTCGCGGACTGCCTGGCGCTGCTCAGGCGAGGC	-	AGC85542.1	Ala55_Asp59dup	Col-SM2-2/Col-6	DMSO-1/Col-SM2-6/DMSO-3/Col-SM3-6/Col-SM3-2
hypothetical protein	APECO78_06255	1278346^1278347	Insertion	-	C	AGC85984.1	Ser40fs	Col-SM2-2/Col-6/Col-5/Col-3/Col-1	DMSO-1
hypothetical protein	APECO78_06195	1271700	SNV	C	T	AGC85972.1	Asp27Asn	Col-3	DMSO-1/Col-SM3-6/Col-SM2-6
phage replication protein O	APECO78_06315	1286554	SNV	A	C	AGC84960.1	His152Gln	Col-SM3-5	DMSO-1/DMSO-3/Col-SM3-2/Col-SM3-6/Col-SM2-6
phage replication protein O	APECO78_06315	1286709	SNV	A	C	AGC84960.1	Ser101Ala	Col-SM3-5/Col-5	Col-SM3-2/Col-SM3-2/Col-SM3-6
phage replication protein O	APECO78_06315	1286832^1286833	Insertion	-	GTCAGATTTTGATGC	AGC84960.1	Ala55_Asp59dup	Col-SM2-2/Col-3	DMSO-3/Col-SM3-6/Col-SM3-2
putative transposase	APECO78_13450	2759581	SNV	A	G	AGC87419.1	Cys221Arg	Col-SM3-5/Col-SM2-2/Col-6/Col-3	DMSO-3/Col-SM3-2/Col-SM2-6
putative transposase	APECO78_13450	2760143..2760145	MNV	CCC	TGG	AGC87419.1	Gly33Pro	Col-SM3-5/Col-SM2-2/Col-5/Col-3/Col-1	Col-SM2-6
putative transposase	APECO78_13450	2759587	SNV	G	A	AGC87419.1	His219Tyr	Col-SM2-2/Col-6/Col-3	Col-SM2-6/DMSO-3/Col-SM3-2/Col-SM2-4/Col-SM2-6
putative transposase	APECO78_13450	2759705	SNV	C	A	AGC87419.1	Glu179Asp	Col-SM2-2/Col-6/Col-3	Col-SM2-6/DMSO-3/Col-SM2-4
putative transposase	APECO78_13450	2759713..2759714	MNV	CT	TA	AGC87419.1	Val177Ile	Col-SM2-2/Col-6/Col-3/Col-1	Col-SM2-6/DMSO-3/Col-SM3-6
putative transposase	APECO78_13450	2760014	SNV	A	C	AGC87419.1	Asn76Lys	Col-SM2-2/Col-6	Col-SM2-6/Col-SM2-4/Col-SM3-6/Col-SM3-2
putative transposase	APECO78_13450	2760189	SNV	C	A	AGC87419.1	Arg18Leu	Col-SM2-2/Col-5/Col-3/Col-1	Col-SM2-6/Col-SM2-4/Col-SM3-6/Col-SM3-2
putative transposase	APECO78_13450	2759640	SNV	T	C	AGC87419.1	Lys201Arg	Col-SM2-2/Col-6/Col-3	Col-SM2-4/DMSO-3/Col-SM3-2/Col-SM2-4
putative transposase	APECO78_13450	2759673	SNV	T	G	AGC87419.1	Lys190Thr	Col-SM2-2/Col-6/Col-3	Col-SM2-4/DMSO-3/Col-SM2-4
putative transposase	APECO78_13450	2759772	SNV	G	A	AGC87419.1	Ala157Val	Col-6/Col-5/Col-1	Col-SM3-6/Col-SM2-4/Col-SM2-6/DMSO-3
antitermination protein Q from phage origin	APECO78_06280	1282525	SNV	A	T	AGC86222.1	Asp9Glu	Col-SM3-5/Col-SM2-2/Col-6/Col-5/Col-1	Col-SM2-6
antitermination protein Q from phage origin	APECO78_06280	1282508	SNV	G	A	AGC86222.1	Ala15Val	Col-6/Col-5/Col-3/Col-1	Col-SM2-6/Col-SM2-4
antitermination protein Q from phage origin	APECO78_07455	1533769	SNV	A	G	AGC86222.1	Ile20Val	Col-5	DMSO-1/Col-SM2-6/DMSO-3/Col-SM2-4/Col-SM3-6/Col-SM3-2
antitermination protein Q from phage origin	APECO78_07455	1533773..1533774	MNV	TC	GT	AGC86222.1	Val21Gly	Col-5	DMSO-1/DMSO-3/Col-SM2-4/Col-SM3-6/Col-SM3-2
antitermination protein Q from phage origin	APECO78_07455	1533790	SNV	T	G	AGC86222.1	Ser27Ala	Col-5	DMSO-1/DMSO-3/Col-SM2-4/Col-SM3-6/Col-SM3-2
antitermination protein Q from phage origin	APECO78_07455	1533798..1533799	MNV	AG	CC	AGC86222.1	Gly30Arg	Col-5	DMSO-1/DMSO-3/Col-SM2-4/Col-SM3-6/Col-SM3-2
antitermination protein Q from phage origin	APECO78_07455	1533808	SNV	T	G	AGC86222.1	Cys33Gly	Col-5/Col-3	DMSO-1/DMSO-3/Col-SM2-4/Col-SM3-6/Col-SM3-2
antitermination protein Q from phage origin	APECO78_07455	1533810..1533811	MNV	CT	GC	AGC86222.1	Cys33_Cys34delinsTrpArg	Col-5/Col-3	DMSO-1/DMSO-3/Col-SM2-4/Col-SM3-6/Col-SM3-2
antitermination protein Q from phage origin	APECO78_07455	1533832..1533837	MNV	AAAAGG	CGTTTA	AGC86222.1	Lys41_Arg42delinsArgLeu	Col-5/Col-3	DMSO-1/DMSO-3/Col-SM2-4/Col-SM3-6/Col-SM3-2
antitermination protein Q from phage origin	APECO78_07455	1533855..1533856	MNV	CA	TG	AGC86222.1	Ile49Val	Col-5/Col-3	DMSO-1/DMSO-3/Col-SM2-4/Col-SM3-6/Col-SM3-2
antitermination protein Q from phage origin	APECO78_07455	1533859	SNV	A	G	AGC86222.1	Ile50Val	Col-5/Col-3	DMSO-1/DMSO-3/Col-SM2-4/Col-SM3-6/Col-SM3-2
antitermination protein Q from phage origin	APECO78_07455	1533820	SNV	G	T	AGC86222.1	Gly37Cys	Col-3	DMSO-3/DMSO-1/Col-SM3-6/Col-SM3-2/Col-SM2-4
antitermination protein Q from phage origin	APECO78_07455	1533824..1533826	MNV	ATA	GGG	AGC86222.1	Tyr38_Ile39delinsTrpVal	Col-3	DMSO-3/DMSO-1/Col-SM3-6/Col-SM3-2/Col-SM2-4
antitermination protein Q from phage origin	APECO78_07455	1533877..1533879	MNV	GCA	ATG	AGC86222.1	Ala56Met	Col-3	DMSO-3/DMSO-1/Col-SM3-6/Col-SM3-2/Col-SM2-4
antitermination protein Q from phage origin	APECO78_07455	1533864	SNV	A	T	AGC86222.1	Glu51Asp	Col-3	Col-SM2-4
Iss (increased serum survival)	APECO78_06230	1276380..1276388	Deletion	AATTGCATG	-	AGC85979.1	*98fs	Col-SM2-2/Col-6/Col-5/Col-3/Col-1	DMSO-1/Col-SM3-2
Rz endopeptidase from lambdoid prophage DLP12	APECO78_07475	1536957	Deletion	A	-	AGC86226.1	*154fs	Col-SM2-2/Col-6/Col-5/Col-3/Col-1	DMSO-1/Col-SM2-6/Col-SM2-4/Col-SM3-6/Col-SM3-2
Rz endopeptidase from lambdoid prophage DLP12	APECO78_07475	1536920	SNV	G	T	AGC86226.1	Glu142*	Col-6/Col-5/Col-1	DMSO-1/Col-SM3-6/Col-SM2-4/DMSO-3/Col-SM3-2/Col-SM2-6
Rz endopeptidase from lambdoid prophage DLP12	APECO78_07475	1536926	SNV	A	G	AGC86226.1	Thr144Ala	Col-6/Col-5/Col-1	DMSO-1/Col-SM3-6/Col-SM2-4/Col-SM3-2/Col-SM2-6/DMSO-3
Rz endopeptidase from lambdoid prophage DLP12	APECO78_07475	1536870	SNV	G	A	AGC86226.1	Arg125Gln	Col-5	DMSO-1/Col-SM2-6/DMSO-3/Col-SM2-4/Col-SM3-6/Col-SM3-2
Rz endopeptidase from lambdoid prophage DLP12	APECO78_07475	1536879^1536880	Insertion	-	C	AGC86226.1	Thr129fs	Col-5	DMSO-1/Col-SM2-6/DMSO-3/Col-SM2-4/Col-SM3-6/Col-SM3-2
Rz endopeptidase from lambdoid prophage DLP12	APECO78_07475	1536881	SNV	A	T	AGC86226.1	Thr129Ser	Col-5	DMSO-1/Col-SM2-6/DMSO-3/Col-SM2-4/Col-SM3-6/Col-SM3-2
Lambdoid prophage DLP12 Bor-like protein	APECO78_07480	1536982..1536990	Deletion	TCATGCAAT	-	AGC86227.1	*98fs	Col-SM2-2/Col-6/Col-5/Col-3/Col-1	DMSO-1/Col-SM2-6/Col-SM2-4/Col-SM3-6/Col-SM3-2
Lambdoid prophage DLP12 Bor-like protein	APECO78_07480	1537035	SNV	T	A	AGC86227.1	Leu83Phe	Col-5	DMSO-1/Col-SM2-6/DMSO-3/Col-SM2-4/Col-SM3-6/Col-SM3-2
Lambdoid prophage DLP12 Bor-like protein	APECO78_07480	1537139..1537140	MNV	TC	CT	AGC86227.1	Lys49Glu	Col-5	DMSO-1/Col-SM2-6/DMSO-3/Col-SM2-4/Col-SM3-6/Col-SM3-2
uroporphyrinogen III C-methyltransferase	APECO78_22845	4751353^4751354	Insertion	-	GGTGCAGGTGCA	AGC89286.1	Pro389_Gln390insAlaProAlaPro	Col-SM2-2	DMSO-1/Col-SM2-4/DMSO-3/Col-SM3-6/Col-SM3-2
putative portal protein	APECO78_11530	2386235	SNV	G	T	AGC87035.1	Arg237Ser	Col-SM2-2/Col-5	Col-SM3-6
terminase large subunit	APECO78_11540	2388231..2388233	Replacement	CCC	AG	AGC87037.1	Trp318fs	Col-SM2-2/Col-6/Col-5/Col-3	Col-SM3-6
terminase large subunit	APECO78_11540	2388235^2388236	Insertion	-	T	AGC87037.1	Trp318fs	Col-6/Col-5/Col-3	Col-SM3-6
terminase large subunit	APECO78_11540	2388264	SNV	T	C	AGC87037.1	Met308Val	Col-6/Col-5	Col-SM3-6
YD repeat protein	APECO78_07035	1448790	SNV	C	G	AGC86138.1	Ala68Gly	Col-6	DMSO-1/Col-SM3-6/Col-SM2-4/DMSO-3/Col-SM3-2/Col-SM2-6
bacteriophage lysis protein	APECO78_06235	1276414	Deletion	T	-	AGC85980.1	*154fs	Col-5/Col-3	DMSO-1/Col-SM2-6/Col-SM3-6

## Sheet: Dataset-2
Dataset 2: Synonymous mutations observed in ColR APEC isolates.
Product (CP004009 (CDS))	CP004009 (CDS)	Region	Type	Reference	Allele	Protein id	Isolates having mutation	Isolates with no-mutation
hypothetical protein	APECO78_06195	1271740	SNV	A	G	AGC85972.1	Col-SM3-5/Col-SM2-2/Col-6	DMSO-1/DMSO-3/Col-SM3-2/Col-SM2-6/Col-SM2-4
hypothetical protein	APECO78_06200	1271796	SNV	C	T	AGC85973.1	Col-SM3-5/Col-SM2-2/Col-6/Col-3	DMSO-1/DMSO-3/Col-SM3-2/Col-SM2-6/Col-SM2-4
hypothetical protein	APECO78_06200	1271979	SNV	T	C	AGC85973.1	Col-SM3-5/Col-SM2-2/Col-6/Col-5/Col-3/Col-1	DMSO-1
hypothetical protein	APECO78_04025	831377	SNV	G	T	AGC85542.1	Col-SM3-5/Col-5/Col-3/Col-1	Col-SM2-4/col-SM2-6
hypothetical protein	APECO78_06310	1286222	SNV	C	T	AGC85995.1	Col-SM2-2/Col-5/Col-3/Col-1	Col-SM2-6/Col-SM3-2
hypothetical protein	APECO78_06310	1286225	SNV	A	C	AGC85995.1	Col-SM2-2/Col-5/Col-3/Col-1	Col-SM2-6/Col-SM3-2
hypothetical protein	APECO78_02460	517307	SNV	A	G	AGC85231.1	Col-SM2-2/Col-6/Col-5/Col-3/Col-1	Col-SM3-6/Col-SM2-6
hypothetical protein	APECO78_06195	1271692	SNV	T	C	AGC85972.1	Col-6/Col-3	DMSO-1/Col-SM3-6/Col-SM3-2/Col-SM2-6/Col-SM3-2
hypothetical protein	APECO78_06210	1273592	SNV	C	T	AGC85975.1	Col-3	DMSO-3/Col-SM3-6/Col-SM3-2/Col-SM2-6/Col-SM2-4
hypothetical protein	APECO78_06195	1271710	SNV	T	C	AGC85972.1	Col-3	DMSO-1/Col-SM3-6/Col-SM2-6
hypothetical protein	APECO78_06195	1271707	SNV	A	G	AGC85972.1	Col-3	Col-SM2-6
phage replication protein O	APECO78_06315	1286452	SNV	A	G	AGC84960.1	Col-SM3-5/Col-6/Col-3/Col-1	DMSO-1/Col-SM3-6/Col-SM2-6
phage replication protein O	APECO78_06315	1286419	SNV	A	G	AGC84960.1	Col-SM3-5/Col-SM2-2/Col-6/Col-5/Col-3/Col-1	Col-SM2-6
phage replication protein O	APECO78_06315	1286455	SNV	A	T	AGC84960.1	Col-SM3-5/Col-SM2-2/Col-6/Col-3/Col-1	DMSO-1/Col-SM3-6/Col-SM2-6
phage replication protein O	APECO78_06315	1286461	SNV	A	C	AGC84960.1	Col-SM3-5/Col-SM2-2/Col-6/Col-3/Col-1	DMSO-1/Col-SM3-6/Col-SM2-6
phage replication protein O	APECO78_06315	1286470	SNV	C	T	AGC84960.1	Col-SM3-5/Col-SM2-2/Col-6/Col-3/Col-1	DMSO-1/Col-SM3-6/Col-SM2-6
phage replication protein O	APECO78_06315	1286551	SNV	G	A	AGC84960.1	Col-SM3-5/Col-SM2-2	DMSO-1/DMSO-3/Col-SM3-2/Col-SM3-6/Col-SM2-6
phage repressor protein	APECO78_01095	242383	SNV	T	G	AGC85996.1	Col-SM3-5/Col-SM2-2/Col-5	Col-SM3-2/Col-SM2-4/Col-SM2-6
phage repressor protein	APECO78_01095	242392	SNV	G	A	AGC85996.1	Col-SM3-5/Col-SM2-2/Col-5	Col-SM3-2/Col-SM2-4/Col-SM2-6
phage repressor protein	APECO78_01095	242380	SNV	C	T	AGC85996.1	Col-SM3-5/Col-SM2-2/Col-5	Col-SM2-4/Col-SM3-6/Col-SM2-6
phage repressor protein	APECO78_01095	242488	SNV	C	T	AGC85996.1	Col-SM2-2/Col-5/Col-3/Col-1	Col-SM2-6/Col-SM2-4/Col-SM3-2
phage repressor protein	APECO78_01095	242449	SNV	A	G	AGC85996.1	Col-SM2-2/Col-5/Col-3/Col-1	Col-SM3-2/Col-SM2-6/Col-SM2-4
phage repressor protein	APECO78_01095	242407	SNV	G	A	AGC85996.1	Col-SM2-2/Col-5	Col-SM2-4/Col-SM3-2/Col-SM2-6
electron transport complex protein RnfC	APECO78_11960	2466836	SNV	T	C	AGC87121.1	Col-SM3-5/Col-5/Col-3	Col-SM3-2
lss (increased serum survival)	APECO78_06230	1276102	SNV	G	A	AGC85979.1	Col-SM3-5/Col-SM2-2/Col-6/Col-5/Col-3/Col-1	Col-SM3-6
antitermination protein Q from phage origin	APECO78_06280	1282528	SNV	C	A	AGC86222.1	Col-SM3-5/Col-SM2-2/Col-6/Col-5/Col-3/Col-1	Col-SM2-6
antitermination protein Q from phage origin	APECO78_07455	1533783	SNV	A	G	AGC86222.1	Col-5	DMSO-1/DMSO-3/Col-SM2-4/Col-SM3-6/Col-SM3-2
antitermination protein Q from phage origin	APECO78_07455	1533786	SNV	C	T	AGC86222.1	Col-5	DMSO-1/DMSO-3/Col-SM2-4/Col-SM3-6/Col-SM3-2
antitermination protein Q from phage origin	APECO78_07455	1533792	SNV	A	G	AGC86222.1	Col-5	DMSO-1/DMSO-3/Col-SM2-4/Col-SM3-6/Col-SM3-2
antitermination protein Q from phage origin	APECO78_07455	1533795	SNV	G	T	AGC86222.1	Col-5	DMSO-1/DMSO-3/Col-SM2-4/Col-SM3-6/Col-SM3-2
antitermination protein Q from phage origin	APECO78_07455	1533804	SNV	G	A	AGC86222.1	Col-5/Col-3	DMSO-1/DMSO-3/Col-SM2-4/Col-SM3-6/Col-SM3-2
antitermination protein Q from phage origin	APECO78_07455	1533813	SNV	C	T	AGC86222.1	Col-5/Col-3	DMSO-1/DMSO-3/Col-SM2-4/Col-SM3-6/Col-SM3-2
antitermination protein Q from phage origin	APECO78_07455	1533828	SNV	C	T	AGC86222.1	Col-5/Col-3	DMSO-1/DMSO-3/Col-SM2-4/Col-SM3-6/Col-SM3-2
antitermination protein Q from phage origin	APECO78_07455	1533840	SNV	A	G	AGC86222.1	Col-5/Col-3	DMSO-1/DMSO-3/Col-SM2-4/Col-SM3-6/Col-SM3-2
antitermination protein Q from phage origin	APECO78_07455	1533852	SNV	G	A	AGC86222.1	Col-5/Col-3	DMSO-1/DMSO-3/Col-SM2-4/Col-SM3-6/Col-SM3-2
antitermination protein Q from phage origin	APECO78_07455	1533867	SNV	G	C	AGC86222.1	Col-5/Col-3	DMSO-1/DMSO-3/Col-SM3-6/Col-SM3-2/Col-SM2-4
antitermination protein Q from phage origin	APECO78_07455	1533759	SNV	A	G	AGC86222.1	Col-5	DMSO-3/Col-SM2-4/Col-SM3-6/Col-SM3-2
antitermination protein Q from phage origin	APECO78_07455	1533822	SNV	T	C	AGC86222.1	Col-3	DMSO-3/DMSO-1/Col-SM3-2/Col-SM2-4
putative transposase	APECO78_13450	2759510	SNV	T	G	AGC84960.1	Col-SM3-5/Col-SM2-2/Col-6/Col-5/Col-3/Col-1	Col-SM2-6
putative transposase	APECO78_13450	2759711	SNV	G	A	AGC84960.1	Col-SM2-2/Col-6/Col-3/Col-1	Col-SM2-6/Col-SM2-4/DMSO-3/Col-SM3-6
putative transposase	APECO78_13450	2760026	SNV	G	A	AGC84960.1	Col-SM2-2/Col-6/Col-3	Col-SM2-6/DMSO-3/Col-SM3-6/Col-SM2-4
putative transposase	APECO78_13450	2760035	SNV	A	G	AGC84960.1	Col-SM2-2/Col-6/Col-3/Col-1	Col-SM2-6/Col-SM2-4/DMSO-3/Col-SM3-6
putative transposase	APECO78_13450	2760062	SNV	T	C	AGC84960.1	Col-SM2-2/Col-6/Col-5/Col-1	Col-SM2-6
putative transposase	APECO78_13450	2760152	SNV	G	A	AGC84960.1	Col-SM2-2/Col-6/Col-5/Col-3/Col-1	Col-SM2-6
putative transposase	APECO78_13450	2760155	SNV	G	A	AGC84960.1	Col-SM2-2/Col-6/Col-5/Col-3/Col-1	Col-SM2-6/Col-SM3-2
putative transposase	APECO78_13450	2760161	SNV	A	G	AGC84960.1	Col-SM2-2/Col-6/Col-5/Col-3/Col-1	Col-SM2-6/Col-SM2-4/Col-SM3-6/Col-SM3-2
putative transposase	APECO78_13450	2760164	SNV	A	C	AGC84960.1	Col-SM2-2/Col-6/Col-5/Col-3/Col-1	Col-SM2-6/Col-SM2-4/Col-SM3-2
putative transposase	APECO78_13450	2760167	SNV	G	T	AGC84960.1	Col-SM2-2/Col-6/Col-5/Col-3/Col-1	Col-SM2-6/Col-SM2-4/Col-SM3-2
putative transposase	APECO78_13450	2760176	SNV	A	G	AGC84960.1	Col-SM2-2/Col-5/Col-3/Col-1	Col-SM2-6/Col-SM2-4/Col-SM3-2/Col-SM3-6
putative transposase	APECO78_13450	2760191	SNV	T	C	AGC84960.1	Col-SM2-2/Col-5/Col-3/Col-1	Col-SM2-6/Col-SM2-4/DMSO-3/Col-SM3-6/Col-SM3-2
putative transposase	APECO78_13450	2760008	SNV	A	C	AGC84960.1	Col-6	Col-SM3-6/Col-SM2-4/DMSO-3/Col-SM3-2/Col-SM2-6
Rz endopeptidase from lambdoid prophage DLP12	APECO78_07475	1536946	SNV	G	A	AGC86226.1	Col-SM2-2/Col-6/Col-3/Col-1	DMSO-1/Col-SM2-4/Col-SM3-6/Col-SM3-2/Col-SM2-6
Rz endopeptidase from lambdoid prophage DLP12	APECO78_07475	1536922	SNV	A	G	AGC86226.1	Col-6/Col-1	DMSO-1/Col-SM2-4/DMSO-3/Col-SM3-2/Col-SM2-6/Col-SM3-6
Rz endopeptidase from lambdoid prophage DLP12	APECO78_07475	1536922	SNV	A	G	AGC86226.1	Col-6/Col-1	Col-SM3-6/DMSO-3/DMSO-1/Col-SM3-2/Col-SM2-6
Rz endopeptidase from lambdoid prophage DLP12	APECO78_07475	1536898	SNV	G	T	AGC86226.1	Col-5/Col-1	DMSO-1/Col-SM2-6/DMSO-3/Col-SM2-4/Col-SM3-6/Col-SM3-2
Rz endopeptidase from lambdoid prophage DLP12	APECO78_07475	1536922	SNV	A	G	AGC86226.1	Col-5/Col-1	DMSO-1/Col-SM2-6/Col-SM2-4/Col-SM3-2/DMSO-3/Col-SM3-6
Rz endopeptidase from lambdoid prophage DLP12	APECO78_07475	1536946	SNV	G	A	AGC86226.1	Col-5/Col-3/Col-1	DMSO-1/Col-SM2-6/Col-SM2-4/Col-SM3-6/Col-SM3-2
Lambdoid prophage DLP12 Bor-like protein	APECO78_07480	1537005	SNV	C	T	AGC86227.1	Col-SM2-2/Col-6/Col-5	DMSO-1/Col-SM2-6/Col-SM2-4/Col-SM3-2/Col-SM3-6
Lambdoid prophage DLP12 Bor-like protein	APECO78_07480	1537008	SNV	A	C	AGC86227.1	Col-SM2-2/Col-6/Col-5	DMSO-1/Col-SM2-6/Col-SM2-4/Col-SM3-6/Col-SM3-2
Lambdoid prophage DLP12 Bor-like protein	APECO78_07480	1537011	SNV	C	G	AGC86227.1	Col-SM2-2/Col-6/Col-5	DMSO-1/Col-SM2-6/Col-SM2-4/Col-SM3-6/Col-SM3-2
Lambdoid prophage DLP12 Bor-like protein	APECO78_07480	1537041	SNV	A	G	AGC86227.1	Col-5	DMSO-1/DMSO-3/Col-SM3-6
Lambdoid prophage DLP12 Bor-like protein	APECO78_07480	1537077	SNV	G	A	AGC86227.1	Col-5	DMSO-1/Col-SM2-6/Col-SM2-4/Col-SM3-6/Col-SM3-2
Lambdoid prophage DLP12 Bor-like protein	APECO78_07480	1537104	SNV	G	A	AGC86227.1	Col-5	DMSO-1/Col-SM2-6/Col-SM2-4/Col-SM3-6/Col-SM3-2
Lambdoid prophage DLP12 Bor-like protein	APECO78_07480	1537128	SNV	G	A	AGC86227.1	Col-5	DMSO-1/Col-SM2-6/DMSO-3/Col-SM2-4/Col-SM3-6/Col-SM3-2
Lambdoid prophage DLP12 Bor-like protein	APECO78_07480	1537143	SNV	C	T	AGC86227.1	Col-5	DMSO-1/Col-SM2-6/DMSO-3/Col-SM2-4/Col-SM3-6/Col-SM3-2
terminase large subunit	APECO78_11540	2388223	SNV	C	G	AGC87037.1	Col-SM2-2/Col-6/Col-5/Col-3	Col-SM3-6
terminase large subunit	APECO78_11540	2388241	SNV	A	G	AGC87037.1	Col-SM2-2/Col-6/Col-5/Col-3	Col-SM3-6
terminase large subunit	APECO78_11540	2388250	SNV	A	T	AGC87037.1	Col-SM2-2/Col-6/Col-5/Col-3	Col-SM3-6
terminase large subunit	APECO78_11540	2388253	SNV	T	C	AGC87037.1	Col-SM2-2/Col-6/Col-5/Col-3	Col-SM3-6
terminase large subunit	APECO78_11540	2388244	SNV	C	A	AGC87037.1	Col-6/Col-5/Col-3	Col-SM3-6
terminase large subunit	APECO78_11540	2388256	SNV	C	A	AGC87037.1	Col-6/Col-5	Col-SM3-6
terminase large subunit	APECO78_11540	2388259	SNV	T	C	AGC87037.1	Col-6/Col-5/Col-3	Col-SM3-6
bacteriophage lysis protein	APECO78_06235	1276425	SNV	C	T	AGC85980.1	Col-3	DMSO-1/Col-SM3-6/Col-SM3-2/Col-SM2-6/Col-SM2-4
restriction alleviation protein	APECO78_07445	1533409	SNV	T	C	AGC86220.1	Col-1	DMSO-1/Col-SM2-4/Col-SM3-6/Col-SM2-6
